# Supplementary material for: Statistical Analysis of Tract-Tracing Experiments Demonstrates a Dense, Complex Cortical Network in the Mouse
Source: PubMed Central journal article supplement (PMC5019374; doi:10.1371/journal.pcbi.1005104), 2016-09-12

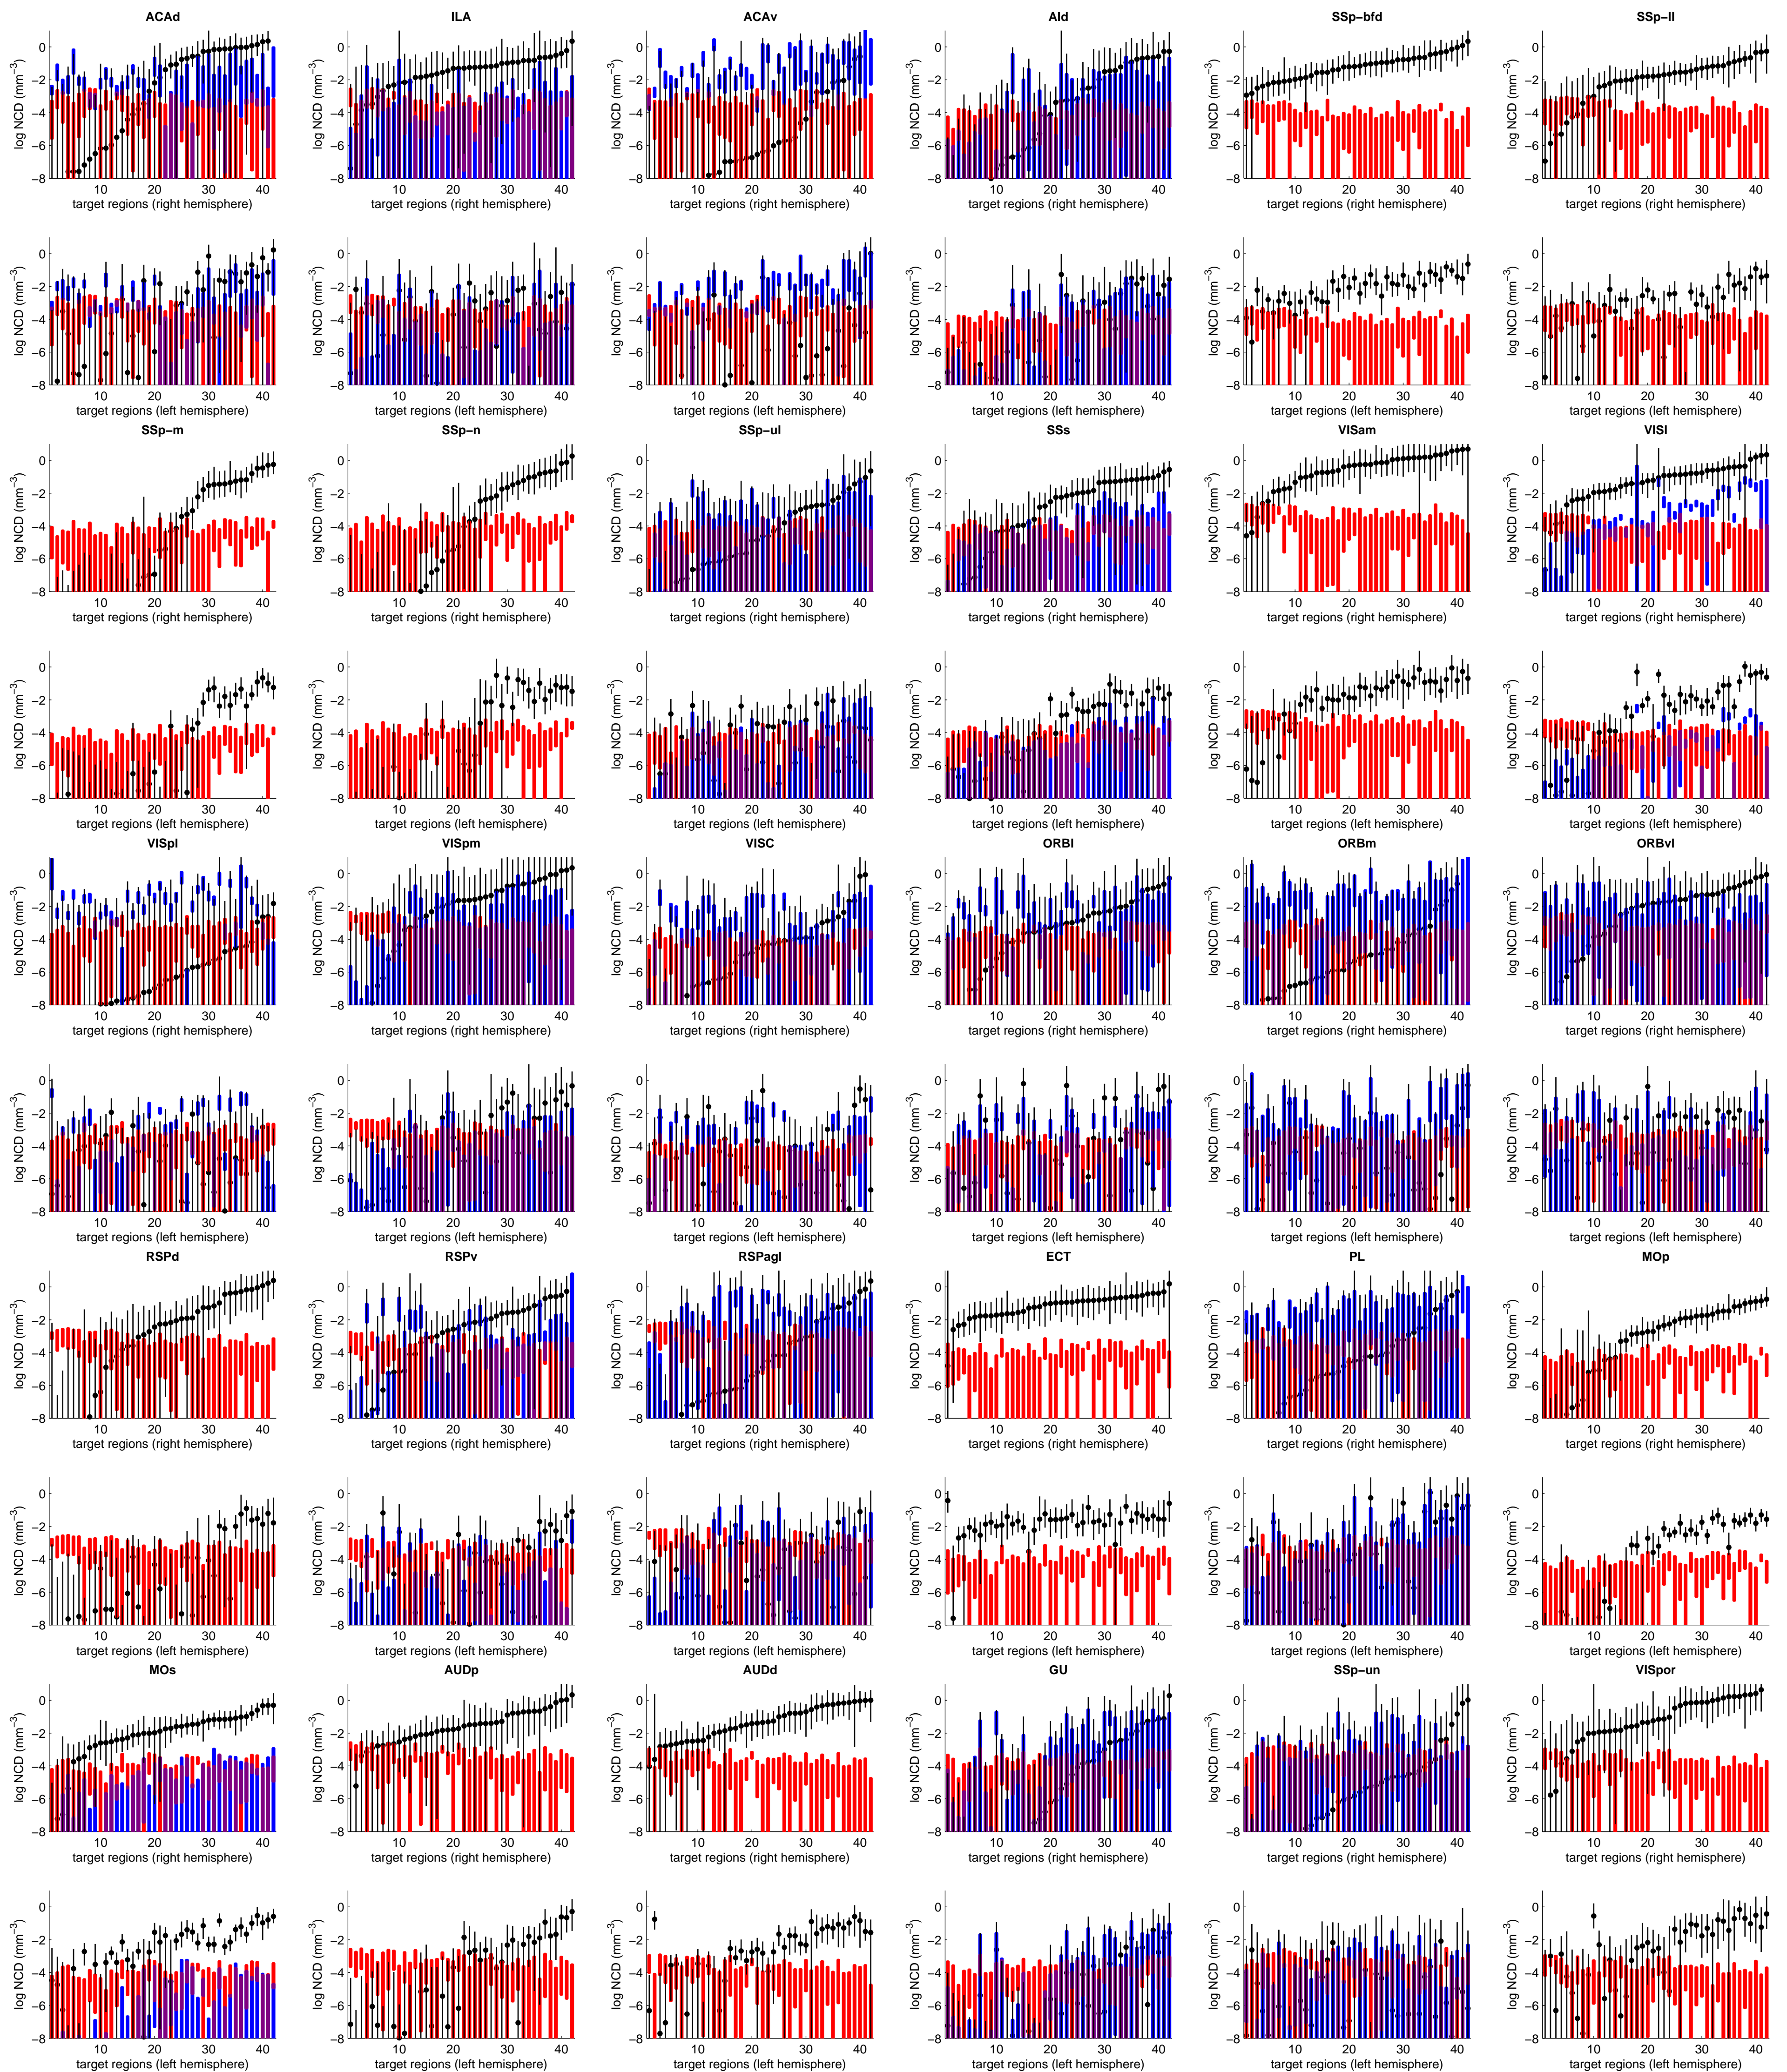

Supplement: pcbi.1005104.s004.pdf [file pcbi.1005104.s004.pdf]
